# Supplementary material for: Oxidative Phosphorus Chemistry Perturbed by Minerals
Source: MDPI journal article supplement (doi:10.3390/life12020198), 2022-01-28
Supplement: s1 [file s1]

# Oxidative Phosphorus Chemistry Perturbed by Minerals

By Arthur Omran <sup>1,2,\*</sup>, Josh Abbatiello <sup>2</sup>, Tian Feng <sup>2</sup> and Matthew A. Pasek <sup>2</sup>

<sup>1</sup> Department of Chemistry, University of North Florida, 1 UNF Drive, Jacksonville, FL 32224, USA

<sup>2</sup> Department of Geosciences, University of South Florida, Tampa, FL 33620, USA; jabbatiello@usf.edu (J.A.); tianfeng1@usf.edu (T.F.); mpasek@usf.edu (M.A.P.)

\* Correspondence: N00431947@unf.edu

**Table S1.** List of Plausibly Prebiotic Minerals.

| Name           | Group     | IMA Formula                                                            | Occurrence*                | Reference |
|----------------|-----------|------------------------------------------------------------------------|----------------------------|-----------|
| Diopside       | Silicate  | CaMgSi <sub>2</sub> O <sub>6</sub>                                     | CM,MA,MT,RM,UM             | [1]       |
| Kaolinite      | Silicate  | Al <sub>2</sub> Si <sub>2</sub> O <sub>5</sub> (OH) <sub>4</sub>       | HY                         |           |
| Orthoclase     | Silicate  | KAlSi <sub>3</sub> O <sub>8</sub>                                      | GR,MA,SD,UM,ZR             |           |
| Antigorite     | Silicate  | Mg <sub>3</sub> Si <sub>2</sub> O <sub>5</sub> (OH) <sub>4</sub>       | CM,HY,SP,UM                |           |
| Forsterite     | Silicate  | Mg <sub>2</sub> SiO <sub>4</sub>                                       | CM,MA,MT,UM,UR             |           |
| Quartz         | Oxide     | SiO <sub>2</sub>                                                       | GR,HY,MT,SD,ZR             |           |
| Hematite       | Oxide     | Fe <sub>2</sub> O <sub>3</sub>                                         | CM,GR,HY,RM,VP             |           |
| Magnetite      | Oxide     | Fe <sub>3</sub> O <sub>4</sub>                                         | CM, GR, MA, MT, RM, SD, UM |           |
| Schreibersite  | Phosphide | (Fe,Ni) <sub>3</sub> P                                                 | MT                         |           |
| Gypsum         | Sulfate   | CaSO <sub>4</sub> ·2H <sub>2</sub> O                                   | EV, LT, MT, PR, VP         |           |
| Siderite       | Carbonate | FeCO <sub>3</sub>                                                      | AK, AU, GR, HY, UM         | [2]       |
| Calcite        | Carbonate | CaCO <sub>3</sub>                                                      | AK,HY,MA,MT,PR             |           |
| Hydroxyapatite | Phosphate | Ca <sub>5</sub> (PO <sub>4</sub> ) <sub>3</sub> OH                     | HY,SP                      | [3]       |
| Newberyite     | Phosphate | MgHPO <sub>4</sub> ·3H <sub>2</sub> O                                  | HY                         |           |
| Struvite       | Phosphate | MgNH <sub>4</sub> PO <sub>4</sub> ·6H <sub>2</sub> O                   | HY                         |           |
| Ulexite        | Borate    | NaCaB <sub>5</sub> O <sub>6</sub> (OH) <sub>6</sub> ·5H <sub>2</sub> O | N/A                        |           |

\* Modes of Occurrence: AK: alkali igneous; AU: authigenic; CM: contact metamorphism; EV: evaporite; GR: granitoid igneous; HY: hydrothermal alteration; LT: low-temperature metamorphism; MA: mafic igneous; MT: meteorite; PR: aqueous precipitate; RM: regional metamorphism; SD: clastic sedimentary environment; SP: serpentinization; UM: ultramafic igneous; UR: “ur-minerals” from pre-solar grains; VP: vapor phase deposition at volcanic fumaroles and other pneumolytic processes; ZR: inclusions in Hadean zircons.[1].

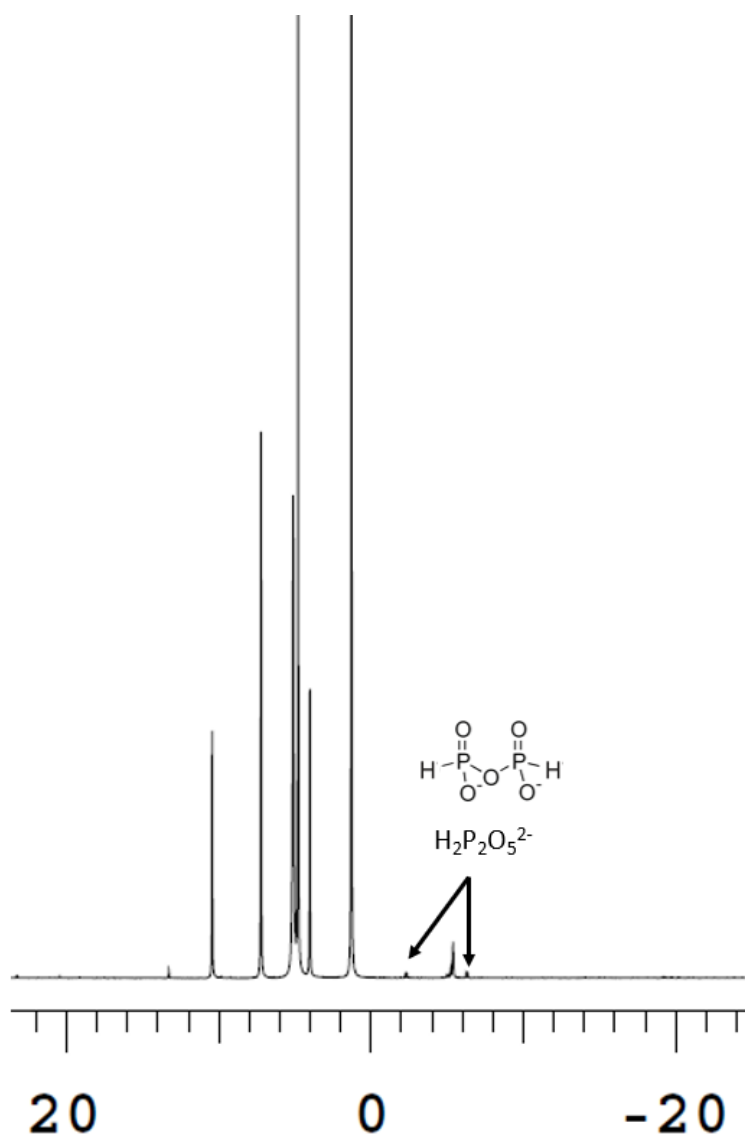

**Figure S1.** Fenton reaction with serpentinite and hypophosphite added. Peaks for pyrophosphite detected at -2.2 and -6.2 ppm.

**Table S2.** Hypophosphite Added Fenton reactions solutional product distribution table. All measurements are from peak integrations in the P31-NMR spectra.

| No Minerals    |                              |        | Serpentinite |                                       |        | Schreibersite |                                |        |
|----------------|------------------------------|--------|--------------|---------------------------------------|--------|---------------|--------------------------------|--------|
|                |                              | Int. % |              |                                       | Int. % |               |                                | Int. % |
| 1              | $\text{H}_2\text{PO}_2^{1-}$ | 23.1   | 1            | $\text{H}_2\text{PO}_2^{1-}$          | 23.6   | 1             | $\text{H}_2\text{PO}_2^{1-}$   | 0.5    |
| 2              | $\text{HPO}_3^{2-}$          | 47.1   | 2            | $\text{HPO}_3^{2-}$                   | 50.7   | 2             | $\text{HPO}_3^{2-}$            | 20     |
| 3              | $\text{PO}_4^{3-}$           | 28.5   | 3            | $\text{PO}_4^{3-}$                    | 23.1   | 3             | $\text{PO}_4^{3-}$             | 57.6   |
| 4              | $\text{P}_2\text{O}_7^{4-}$  | 1.1    | 4            | $\text{P}_2\text{O}_7^{4-}$           | 1.1    | 4             | $\text{P}_2\text{O}_7^{4-}$    | 21.2   |
| 5              | $\text{P}_2\text{O}_6^{4-}$  | 0.2    | 5            | $\text{P}_2\text{O}_6^{4-}$           | 0.03   | 5             | $\text{P}_3\text{O}_{10}^{5-}$ | 0.5    |
|                |                              |        | 6            | $\text{H}_2\text{P}_2\text{O}_5^{2-}$ | 0.34   | 6             | $\text{P}_2\text{O}_6^{4-}$    | 0.2    |
| Hydroxyapatite |                              |        | Kaolinite    |                                       |        | Sand          |                                |        |
|                |                              | Int. % |              |                                       | Int. % |               |                                | Int. % |
| 1              | $\text{H}_2\text{PO}_2^{1-}$ | 11.5   | 1            | $\text{H}_2\text{PO}_2^{1-}$          | 20.6   | 1             | $\text{H}_2\text{PO}_2^{1-}$   | 22.6   |
| 2              | $\text{HPO}_3^{2-}$          | 41     | 2            | $\text{HPO}_3^{2-}$                   | 48.1   | 2             | $\text{HPO}_3^{2-}$            | 49.4   |
| 3              | $\text{PO}_4^{3-}$           | 43.7   | 3            | $\text{PO}_4^{3-}$                    | 29.8   | 3             | $\text{PO}_4^{3-}$             | 26.4   |
| 4              | $\text{P}_2\text{O}_7^{4-}$  | 3.7    | 4            | $\text{P}_2\text{O}_7^{4-}$           | 1.2    | 4             | $\text{P}_2\text{O}_7^{4-}$    | 1.3    |
| 5              | $\text{P}_2\text{O}_6^{4-}$  | 0.03   | 5            | $\text{P}_2\text{O}_6^{4-}$           | 0.2    | 5             | $\text{P}_2\text{O}_6^{4-}$    | 0.3    |

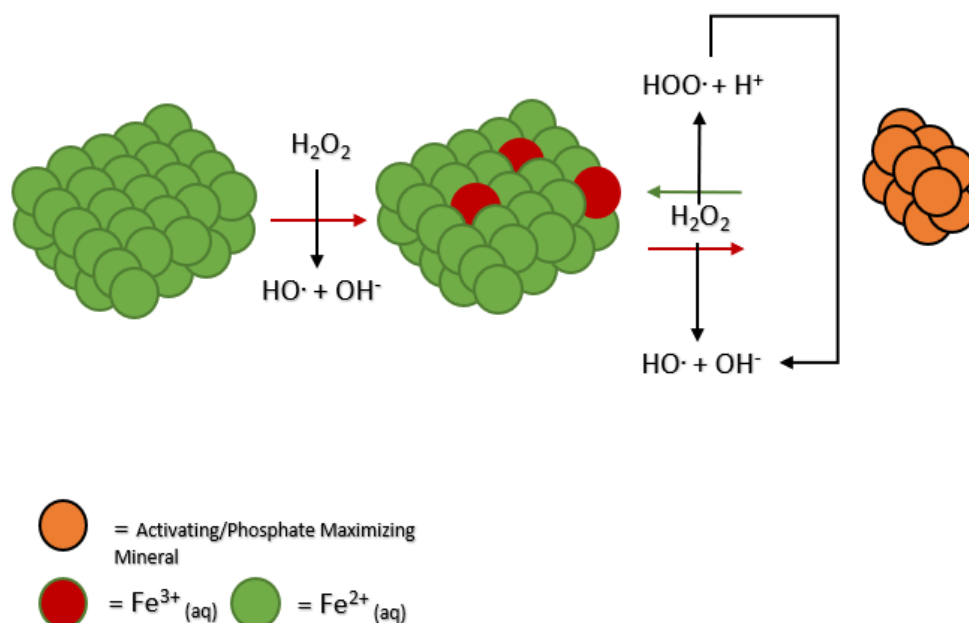

**Figure S2.** Additional Possible Fenton Reaction Diagram. Fenton reaction diagram showing a possible mechanism for increased oxidation by phosphate increasing minerals.

**Table S3.** ICPOES Data. The numbers refer to the counts for the solution phase P (before EDTA/NaOH extraction), mineral phase extracts (after EDTA/NaOH extraction), and extract/solution (count 1 divided by count 2). This is meant to show a before and after treatment so we can get an idea of the amount of P in solution and the amount of P in the mineral.

| ICP OES Data   |                |                        |                  |                             |                  |
|----------------|----------------|------------------------|------------------|-----------------------------|------------------|
|                | Solution Phase | Mineral Phase Extracts | Total P molarity | Fraction of P recovered (%) | Extract/Solution |
| Blank          | 9.17386E-06    | 2.14883E-05            | 3.06622E-05      |                             |                  |
| Calcite        | 0.051133892    | 0.011530277            | 0.062664169      | 62.66416894                 | 18.40011188      |
| Diopside       | 0.1001181      | 0.002866117            | 0.102984217      | 102.9842169                 | 2.783064222      |
| Gypsum         | 0.064682466    | 0.003267984            | 0.06795045       | 67.95045023                 | 4.809362954      |
| Hydroxyapatite | 1.89739E-05    | 0.018070992            | 0.018089965      | 18.08996547                 | 99.89511367      |
| Hematite       | 0.069249782    | 0.00206493             | 0.071314712      | 71.31471223                 | 2.895517907      |
| Kaolinite      | 0.071491559    | 0.005637645            | 0.077129203      | 77.1292034                  | 7.309351552      |
| Magnetite      | 0.087120459    | 0.003514417            | 0.090634876      | 90.63487577                 | 3.877555076      |
| Newberyite     | 0.109277524    | 0.003267984            | 0.112545507      | 112.5455073                 | 2.903699898      |
| Olivine        | 0.073745617    | 0.001611778            | 0.075357395      | 75.35739521                 | 2.138845607      |
| Orthoclase     | 0.063897007    | 0.006769353            | 0.07066636       | 70.66636025                 | 9.579314553      |
| Sand           | 0.087929742    | 0.001871158            | 0.089800899      | 89.80089904                 | 2.083673489      |
| Schriebersite  | 0.1111905      | 0.006178802            | 0.117369302      | 117.3693023                 | 5.264410941      |
| Siderite       | 0.052652662    | 0.003111932            | 0.055764595      | 55.76459463                 | 5.58048069       |
| Serpentinite   | 0.082533096    | 0.00274475             | 0.085277847      | 85.27784664                 | 3.218596937      |
| Struvite       | 0.116365584    | 0.006552379            | 0.122917963      | 122.917963                  | 5.330692685      |
| Ulexite        | 0.064555406    | 0.009305467            | 0.073860873      | 73.86087333                 | 12.59864261      |

**Table S4.** Mineral Extraction NMR Data. All measurements are from peak integrations in the P31-NMR spectra. The before group represents the solution phase before we extracted the sample with EDTA/NaOH. The after group represents the left-over P in the mineral phase liberated after EDTA/NaOH extraction.

| NMR Data |           |           |               |              |
|----------|-----------|-----------|---------------|--------------|
|          | Phosphite | Phosphate | Pyrophosphate | Triphosphate |
| Before   |           |           |               |              |
| Blank    | 21.6      | 52.6      | 23.2          | 2.6          |
| Calcite  | 4.5       | 75        | 19.7          |              |

| Diopside       | 5.2       | 64   | 27.3 | 2.6  |               |
|----------------|-----------|------|------|------|---------------|
| Gypsum         | 21.7      | 63.7 | 14   | 0.6  |               |
| Hydroxyapatite | 3.8       | 77   | 18.5 | 0.6  |               |
| Hematite       | 19.7      | 49.3 | 28   | 3    |               |
| Kaolinite      | 15        | 53.5 | 28.3 | 3.2  |               |
| Magnetite      | 31.6      | 40.9 | 25   | 2.5  |               |
| Newberyite     | 3.1       | 78.7 | 18.2 |      |               |
| Olivine        | 18.1      | 54.9 | 24.7 | 2.3  |               |
| Orthoclase     | 39.7      | 47.8 | 11.5 | 1    |               |
| Sand           | 14.2      | 54.7 | 28.4 | 2.7  |               |
| Schriebersite  | 11.5      | 52   | 33.3 | 3.1  |               |
| Siderite       | 17.6      | 48.7 | 30.7 | 3    |               |
| Serpentine     | 73.5      | 18.1 | 8.2  | 0.2  |               |
| Struvite       | 7.6       | 47.4 | 44.1 | 0.9  |               |
| Ulexite        | 1.5       | 73.5 | 25   |      |               |
| After          | Phosphite | Pi   | PPi  | PPPi | Hypophosphate |
| Blank          | 17.1      | 58.8 | 24.1 |      |               |
| Calcite        | 2.6       | 64.1 | 33.3 |      |               |
| Diopside       |           | 55.5 | 44.5 |      |               |
| Gypsum         | 9.1       | 65   | 25.9 |      |               |
| Hydroxyapatite |           | 85.5 | 14.5 |      |               |
| Hematite       | 37.5      | 37.8 | 24.6 |      |               |
| Kaolinite      | 16.2      | 54.1 | 29.7 |      |               |
| Magnetite      | 35.2      | 38.8 | 23.5 |      |               |
| Newberyite     | 7         | 70   | 23   |      |               |
| Olivine        | 32.8      | 39.5 | 27.7 |      |               |
| Orthoclase     | 14.8      | 52.9 | 32.3 |      |               |
| Sand           | 14.9      | 51.5 | 33.5 |      |               |
| Schriebersite  | 27.2      | 42.5 | 15.7 | 6    | 8.5           |
| Siderite       | 23.7      | 43.1 | 33.2 |      |               |
| Serpentine     | 78        | 11.4 | 10.6 |      |               |
| Struvite       | 8.8       | 37   | 51.8 | 2.2  |               |
| Ulexite        |           | 57.5 | 42.5 |      |               |

## References

1. Hazen, R.M., *Paleomineralogy of the Hadean Eon: A preliminary species list*. American Journal of Science, **2013**. 313(9): P. 807-843.
2. Feng, T.; et al., *Evolution of Ephemeral Phosphate Minerals on Planetary Environments*. ACS Earth and Space Chemistry, **2021**. 5(7): P. 1647-1656.
3. Gull, M. and M.A. Pasek, *Catalytic Prebiotic Formation of Glycerol Phosphate Esters and an Estimation of Their Steady State Abundance under Plausible Early Earth Conditions*. Catalysts, **2021**. 11(11).
